# Supplementary material for: Comparative Effectiveness of Generic vs Brand-Name Levothyroxine in Achieving Normal Thyrotropin Levels
Source: PubMed Central journal article supplement (PMC7527873; doi:10.1001/jamanetworkopen.2020.17645), 2020-09-30
Supplement: jamanetwopen-e2017645-s001.pdf [file jamanetwopen-e2017645-s001.pdf]

## Supplementary Online Content

Brito JP, Ross JS, Sangaralingham L, et al. Comparative effectiveness of generic vs brand-name levothyroxine in achieving normal thyrotropin levels. *JAMA Netw Open*. 2020;3(9):e2017645. doi:10.1001/jamanetworkopen.2020.17645

**eTable 1.** List of Medications Assessed During the Baseline and Follow-up Periods and List of *ICD* Codes Used to Exclude Patients

**eTable 2.** Baseline Characteristics of Cohort 1

**eTable 3.** Cohort 1 Results of IPTW

This supplementary material has been provided by the authors to give readers additional information about their work.

**eTable 1.** List of Medications Assessed During the Baseline and Follow-up Periods and List of ICD Codes Used to Exclude Patients

|                                                                                                                                                                                                                                                                                                                                                                                                                                                                                                            |
|------------------------------------------------------------------------------------------------------------------------------------------------------------------------------------------------------------------------------------------------------------------------------------------------------------------------------------------------------------------------------------------------------------------------------------------------------------------------------------------------------------|
| <p>PTU, Propylthiouracil, 6-N Propylthiouracil, Methimazole, Felimazole, Northyx, Tapazole, Thiamazole, Carbimazole, Benzylthiouracil, Methylthiouracil), lithium carbonate, amiodarone hydrochloride, phenytoin, interferon alfa, interleukin 2, gefitinib, erlotinib, sorafenib, sunitinib, dasatinib and lenvatinib, imatinib, cabozantinib, or vandetanib.</p> <p>Pregnancy: V22X, V23X, V24X, V27X, Z34X, O09X, Z3AX<br/> Hypopituitarism: 2537, 2532, E230, E893<br/> Thyroid cancer: 193X, C73X</p> |
|------------------------------------------------------------------------------------------------------------------------------------------------------------------------------------------------------------------------------------------------------------------------------------------------------------------------------------------------------------------------------------------------------------------------------------------------------------------------------------------------------------|

**eTable 2.** Baseline Characteristics of Cohort 1

|                                      | Pre-IPTW                       |                             |      | After IPTW                     |                             |      |
|--------------------------------------|--------------------------------|-----------------------------|------|--------------------------------|-----------------------------|------|
|                                      | Generic L-thyroxine (N=15,299) | Brand L-thyroxine (N=2,299) | SD   | Generic L-thyroxine (N=15,299) | Brand L-thyroxine (N=2,299) | SD   |
| <b>Initiating Dose (mcg)</b>         |                                |                             |      |                                |                             |      |
| <= 50                                | 86.6%                          | 81.6%                       | 0.14 | 85.9%                          | 85.6%                       | 0.01 |
| 51 to 100                            | 11.8%                          | 15.5%                       | 0.11 | 12.3%                          | 12.4%                       | 0.00 |
| 101 to 200                           | 1.7%                           | 2.9%                        | 0.08 | 1.8%                           | 2.0%                        | 0.01 |
| <b>TSH Category Baseline (mIU/L)</b> |                                |                             |      |                                |                             |      |
| 4.5 to 9.9                           | 87.2%                          | 88.2%                       | 0.03 | 87.3%                          | 87.4%                       | 0.00 |
| 10-19.9                              | 12.8%                          | 11.8%                       | 0.03 | 12.7%                          | 12.6%                       | 0.00 |
| <b>TSH Baseline (mIU/L)</b>          |                                |                             |      |                                |                             |      |
| Mean (SD)                            | 7.0 (2.8)                      | 6.9 (2.8)                   | 0.04 | 7.0 (2.77)                     | 7.0 (2.90)                  | 0.00 |
| <b>Age (years)</b>                   |                                |                             |      |                                |                             |      |
| Mean (SD)                            | 55.8 (16.2)                    | 50.4 (13.7)                 | 0.36 | 55.1 (16)                      | 54.0 (15.6)                 | 0.02 |
| <b>Sex</b>                           |                                |                             |      |                                |                             |      |
| Female                               | 68.0%                          | 75.1%                       | 0.16 | 69.0%                          | 72.0%                       | 0.04 |
| Male                                 | 32.0%                          | 24.9%                       | 0.16 | 31.0%                          | 29.0%                       | 0.04 |
| <b>Race/Ethnicity</b>                |                                |                             |      |                                |                             |      |
| Asian                                | 4.3%                           | 4.7%                        | 0.02 | 4.3%                           | 4.1%                        | 0.01 |
| Black                                | 8.4%                           | 7.7%                        | 0.03 | 8.3%                           | 8.5%                        | 0.01 |
| Hispanic                             | 10.3%                          | 9.0%                        | 0.04 | 10.1%                          | 10.0%                       | 0.00 |
| White                                | 73.8%                          | 75.4%                       | 0.04 | 74.0                           | 74.3%                       | 0.01 |

|                                                    |           |           |       |           |           |      |
|----------------------------------------------------|-----------|-----------|-------|-----------|-----------|------|
| Unknown                                            | 3.3%      | 3.3%      | 0     | 3.3%      | 3.1%      | 0.01 |
| <b>Health Plan</b>                                 |           |           |       |           |           |      |
| Commercial                                         | 68.8%     | 88.4%     | 0.49  | 71.4%     | 75.2%     | 0.08 |
| Medicare Advantage                                 | 31.2%     | 11.6%     | 0.49  | 28.6%     | 24.8%     | 0.08 |
| <b>Census Region</b>                               |           |           |       |           |           |      |
| Midwest                                            | 12.8%     | 9.2%      | 0.12  | 12.3%     | 11.3%     | 0.03 |
| Northeast                                          | 9.8%      | 9.2%      | 0.02  | 9.7%      | 9.8%      | 0.00 |
| South                                              | 59.0%     | 68.5%     | 0.20  | 60.3%     | 60.7%     | 0.01 |
| West                                               | 18.4%     | 13.1%     | 0.15  | 17.7%     | 18.2%     | 0.01 |
| <b>Charlson Baseline</b>                           |           |           |       |           |           |      |
| Mean (SD)                                          | 1.1 (1.9) | 0.7 (1.4) | 0.24  | 1.0 (1.9) | 1.0 (1.8) | 0.03 |
| <b>Conditions Affecting L-thyroxine Absorption</b> |           |           |       |           |           |      |
| Inflammatory bowel disease                         | 0.7%      | 1.0%      | 0.03  | 1.0%      | 1.0%      | 0.02 |
| Anemia                                             | 5.8%      | 5.2%      | -0.03 | 6.0%      | 6.0%      | 0.03 |
| Estrogen Use (90 days prior)                       | 10.8%     | 16.4%     | 0.16  | 11.0%     | 12.0%     | 0.00 |
| <b>Prescribing Provider Specialty</b>              |           |           |       |           |           |      |
| Endocrinologist                                    | 4.7%      | 19.1%     | 0.46  | 6.6%      | 6.8%      | 0.01 |
| General Provider                                   | 74.2%     | 65.6%     | 0.19  | 73.0%     | 74.3%     | 0.03 |
| Missing/Other                                      | 21.1%     | 15.4%     | 0.15  | 20.4%     | 18.9%     | 0.04 |

Includes adult patients who newly filled either generic or brand L-thyroxine preparations between January 1, 2008 and October 1, 2017.

**eTable 3.** Cohort 1 Results of IPTW

|                           | Generic L-thyroxine (N=15,299) | Brand L-thyroxine (N=2,299) | p-value |
|---------------------------|--------------------------------|-----------------------------|---------|
| TSH Category Result       |                                |                             |         |
| Normal (0.3 to 4.4 mIU/L) | 72.9% (71.3, 74.0)             | 75.4% (73.4, 80.5)          | 0.07    |

TSH levels within 3 months of initiation of brand vs generic L-thyroxine among weighted population of patients with abnormal baseline TSH levels (4.5 to 19.9 units)
